## CORRECTION

# Correction: Multi-stage feature selection (MSFS) algorithm for UWB-based early breast cancer size prediction

V. Vijayasarveswari, A. M. Andrew, M. Jusoh, R. B. Ahmad, T. Sabapathy, R. A. A. Raof, M. N. M. Yasin, S. Khatun, H. A. Rahim

The authors are listed out of order. Please view the correct author order, affiliations, and citation here:

V. Vijayasarveswari<sup>1</sup>, A.M. Andrew<sup>1</sup>, M. Jusoh<sup>1</sup>, R.B. Ahmad<sup>1</sup>, T. Sabapathy<sup>1</sup>, R.A.A. Raof<sup>1</sup>, M.N.M. Yasin<sup>1</sup>, S. Khatun<sup>2</sup>, H.A. Rahim<sup>1</sup>

**1** Advanced Communication Engineering (ACE) Centre of Excellence, Universiti Malaysia Perlis, Kangar, Perlis, West Malaysia, **2** Faculty of Electrical & Electronic Engineering, Universiti Malaysia Pahang, Pekan, Pahang

Vijayasarveswari V, Andrew AM, Jusoh M, Ahmad RB, Sabapathy T, Raof RAA, et al. (2020) Multi-stage feature selection (MSFS) algorithm for UWB-based early breast cancer size prediction. PLoS ONE 15(8): e0229367. <https://doi.org/10.1371/journal.pone.0229367>

There are errors in the Funding statement. The correct Funding statement is as follows: The study was supported by Fundamental Research Grant Scheme (FRGS), Ministry of Education Malaysia under grant number: FRGS/1/2019/TK04/UNIMAP/02/3. No additional external funding was received for this study.

## Reference

1. Vijayasarveswari V, Andrew AM, Jusoh M, Sabapathy T, Raof RAA, Yasin MNM, et al. (2020) Multi-stage feature selection (MSFS) algorithm for UWB-based early breast cancer size prediction. PLoS ONE 15(8): e0229367. <https://doi.org/10.1371/journal.pone.0229367> PMID: 32790672

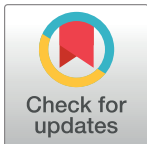

## OPEN ACCESS

**Citation:** Vijayasarveswari V, Andrew AM, Jusoh M, Ahmad RB, Sabapathy T, Raof RAA, et al. (2021) Correction: Multi-stage feature selection (MSFS) algorithm for UWB-based early breast cancer size prediction. PLoS ONE 16(5): e0251679. <https://doi.org/10.1371/journal.pone.0251679>

**Published:** May 6, 2021

**Copyright:** © 2021 Vijayasarveswari et al. This is an open access article distributed under the terms of the [Creative Commons Attribution License](https://creativecommons.org/licenses/by/4.0/), which permits unrestricted use, distribution, and reproduction in any medium, provided the original author and source are credited.
